# Supplementary material for: pDOCK: a new technique for rapid and accurate docking of peptide ligands to Major Histocompatibility Complexes
Source: PubMed Central journal article supplement (PMC2946780; doi:10.1186/1745-7580-6-s1-s2), 2010-09-27
Supplement: 1745-7580-6-S1-S2-S1.pdf [file 1745-7580-6-S1-S2-S1.pdf]

## Additional File 1

### pDOCK: A new technique for rapid and accurate docking of peptide ligands to Major Histocompatibility Complexes

Javed M. Khan and Shoba Ranganathan

**Table S1 – Application of pDOCK to the 186 (149 MHC-I and 37 MHC-II) non-redundant structures from MPID-T2 database.**

C $\alpha$  RMSD values are calculated only for the nonameric core (shown in bold) forming the MHC binding register for peptides with more than 9 residues in the X-ray crystal structures. X: Chemical mimics.

| Allele       | PDB code | Peptide Sequence  | Peptide Length | Res. (Å) | C $\alpha$ RMSD (Å) |
|--------------|----------|-------------------|----------------|----------|---------------------|
| <b>MHC-I</b> |          |                   |                |          |                     |
| HLA-A*0101   | 1w72     | EADPTGHSY         | 9              | 2.15     | 0.42                |
| HLA-A*1101   | 1qvo     | <b>QVPLRPMTYK</b> | 10             | 2.22     | 0.24                |
| HLA-A*1101   | 1x7q     | KTFPTEPK          | 9              | 1.45     | 0.36                |
| HLA-A*1101   | 2hn7     | <b>AIMPARFYPK</b> | 10             | 1.60     | 1.40                |
| HLA-A*1101   | 1q94     | AIFQSSMTK         | 9              | 2.40     | 1.52                |
| HLA-A*0201   | 1oga     | GILGFVFTL         | 9              | 1.40     | 0.16                |
| HLA-A*0201   | 1t1y     | SLYNVVATL         | 9              | 2.00     | 0.78                |
| HLA-A*0201   | 1s8d     | SLANTVATL         | 9              | 2.20     | 0.65                |
| HLA-A*0201   | 2gtz     | ALGIGILTV         | 9              | 1.70     | 0.95                |
| HLA-A*0201   | 1duy     | LFGYPVYV          | 8              | 2.15     | 1.12                |
| HLA-A*0201   | 2p5w     | SLLMWITQC         | 9              | 2.20     | 0.35                |
| HLA-A*0201   | 2v2w     | SLYNTVATL         | 9              | 1.60     | 0.55                |
| HLA-A*0201   | 2v2x     | SLFNTVATL         | 9              | 1.60     | 0.78                |
| HLA-A*0201   | 1qr1     | IISAVVGIL         | 9              | 2.40     | 0.29                |
| HLA-A*0201   | 1qrn     | LLFGYAVYV         | 9              | 2.80     | 0.91                |
| HLA-A*0201   | 1qse     | LLFGYPRYV         | 9              | 2.80     | 0.31                |
| HLA-A*0201   | 1qsf     | LLFGYPVAV         | 9              | 2.80     | 0.34                |
| HLA-A*0201   | 1hhg     | TLTSCNTSV         | 9              | 2.60     | 1.18                |
| HLA-A*0201   | 1lp9     | ALWGFPPVL         | 9              | 2.00     | 0.26                |
| HLA-A*0201   | 1s9x     | SLLMWITQA         | 9              | 2.50     | 0.44                |
| HLA-A*0201   | 1s9y     | SLLMWITQS         | 9              | 2.30     | 0.39                |
| HLA-A*0201   | 1tvb     | ITDQVPFSV         | 9              | 1.80     | 0.38                |
| HLA-A*0201   | 1tvh     | IMDQVPFSV         | 9              | 1.80     | 0.43                |
| HLA-A*0201   | 1akj     | ILKEPVHGV         | 9              | 2.65     | 0.39                |
| HLA-A*0201   | 1eey     | ILSALVGIV         | 9              | 2.25     | 0.92                |
| HLA-A*0201   | 2guo     | AAGIGILTV         | 9              | 1.90     | 2.14                |
| HLA-A*0201   | 1t20     | SLYNTIATL         | 9              | 2.20     | 0.82                |
| HLA-A*0201   | 1ao7     | LLFGYPVYV         | 9              | 2.60     | 0.58                |
| HLA-A*0201   | 1eez     | ILSALVGIL         | 9              | 2.30     | 0.71                |

| Allele     | PDB code | Peptide Sequence     | Peptide Length | Res. (Å) | Cα RMSD (Å) |
|------------|----------|----------------------|----------------|----------|-------------|
| HLA-A*0201 | 2gj6     | LLFGKPVYV            | 9              | 2.56     | 0.97        |
| HLA-A*0201 | 1hhh     | <b>FLPSDFFPSV</b>    | 10             | 3.00     | 0.49        |
| HLA-A*0201 | 1i1f     | FLKEPVHGV            | 9              | 2.80     | 0.64        |
| HLA-A*0201 | 2clr     | <b>MLLSVPLLIG</b>    | 10             | 2.00     | 1.01        |
| HLA-A*0201 | 2gt9     | <b>EAAGIGILTV</b>    | 10             | 1.75     | 0.26        |
| HLA-A*0201 | 1i7r     | FAPGFFPYL            | 9              | 2.20     | 0.47        |
| HLA-A*0201 | 1i7t     | ALWGVFPVL            | 9              | 2.80     | 0.42        |
| HLA-A*0201 | 1i7u     | ALWGFVPVL            | 9              | 1.80     | 0.29        |
| HLA-A*0201 | 1jf1     | <b>ELAGIGILTV</b>    | 10             | 1.85     | 0.30        |
| HLA-A*0201 | 1t1x     | SLYLTVAL             | 9              | 2.20     | 1.72        |
| HLA-A*0201 | 1i1y     | YLKEPVHGV            | 9              | 2.20     | 0.66        |
| HLA-A*0201 | 1t1z     | ALYNTAAAL            | 9              | 1.90     | 1.15        |
| HLA-A*0201 | 2bnq     | SLLMWITQV            | 9              | 1.70     | 0.55        |
| HLA-A*0201 | 2c7u     | SLFNTIAVL            | 9              | 2.38     | 0.86        |
| HLA-A*0201 | 1i4f     | <b>GVYDGREHTV</b>    | 10             | 1.40     | 1.25        |
| HLA-A*0201 | 1bd2     | LLFGYPVYV            | 9              | 2.50     | 0.33        |
| HLA-A*0201 | 2gtw     | LAGIGILTV            | 9              | 1.55     | 3.08        |
| HLA-A*2402 | 2bck     | VYGFVRACL            | 9              | 2.80     | 0.79        |
| HLA-A*6801 | 1tmc     | <b>EVAPPEYHRK</b>    | 10             | 2.30     | 0.54        |
| HLA-B*0801 | 1agc     | GGKKKYQL             | 8              | 2.10     | 0.23        |
| HLA-B*0801 | 1agd     | GGKKKYKL             | 8              | 2.05     | 0.45        |
| HLA-B*0801 | 1agb     | GGRKKYKL             | 8              | 2.20     | 0.28        |
| HLA-B*0801 | 1mi5     | FLRGRAYGL            | 9              | 2.50     | 0.37        |
| HLA-B*1501 | 1xr8     | LEKARGSTY            | 9              | 2.30     | 1.15        |
| HLA-B*1501 | 3c9n     | VQQESSFVM            | 9              | 1.87     | 0.80        |
| HLA-B*2101 | 3bev     | <b>GHAEEYGAETL</b>   | 11             | 2.10     | 0.90        |
| HLA-B*2101 | 3bew     | <b>REVDEQLLSV</b>    | 10             | 2.60     | 0.33        |
| HLA-B*2705 | 1uxs     | RRRWRRRLTV           | 9              | 1.55     | 0.75        |
| HLA-B*2705 | 1ogt     | RRKWRRWHL            | 9              | 1.47     | 0.18        |
| HLA-B*2705 | 2bsr     | RRIYDLIEL            | 9              | 2.30     | 1.72        |
| HLA-B*2705 | 2bst     | SRYWAIRTR            | 9              | 2.10     | 1.36        |
| HLA-B*2705 | 2a83     | RRRWHRWRL            | 9              | 1.40     | 0.18        |
| HLA-B*2705 | 1w0v     | RRLPIFSRL            | 9              | 2.27     | 1.41        |
| HLA-B*2709 | 1w0w     | RRLPIFSRL            | 9              | 2.10     | 0.64        |
| HLA-B*2709 | 1k5n     | GRFAAAIAK            | 9              | 1.09     | 0.75        |
| HLA-B*2709 | 1uxw     | RRRWRRRLTV           | 9              | 1.71     | 0.47        |
| HLA-B*2709 | 1jgd     | <b>RRLLRGHNQY</b>    | 10             | 1.90     | 1.42        |
| HLA-B*3501 | 2cik     | KPIVVLHGY            | 9              | 1.75     | 0.26        |
| HLA-B*3501 | 2axg     | <b>APQPAPENAY</b>    | 10             | 2.00     | 1.14        |
| HLA-B*3501 | 1a9b     | LPPLDITPY            | 9              | 3.20     | 0.39        |
| HLA-B*3501 | 1qew     | FLWGPRALV            | 9              | 2.20     | 0.53        |
| HLA-B*3501 | 1a1n     | VPLRPMTY             | 8              | 2.00     | 0.39        |
| HLA-B*3508 | 3bw9     | <b>CPSQEPMSIYVY</b>  | 12             | 1.75     | 0.27        |
| HLA-B*3508 | 3bwA     | FPTKDVVAL            | 8              | 1.30     | 0.26        |
| HLA-B*3508 | 2ak4     | <b>LPEPLPQGQLTAY</b> | 13             | 2.50     | 1.09        |

| Allele      | PDB code | Peptide Sequence   | Peptide Length | Res. (Å) | C $\alpha$ RMSD (Å) |
|-------------|----------|--------------------|----------------|----------|---------------------|
| HLA-B*3508  | 2axf     | <b>APQPAPENAY</b>  | 10             | 1.80     | 0.51                |
| HLA-B*4402  | 1m6o     | EEFGRAFSF          | 9              | 1.60     | 1.33                |
| HLA-B*4403  | 1sys     | EEPTVIKKY          | 9              | 2.40     | 0.65                |
| HLA-B*4403  | 1n2r     | EEFGRAFSF          | 9              | 1.70     | 0.99                |
| HLA-B*4405  | 1syv     | EEFGRAFSF          | 9              | 1.70     | 0.77                |
| HLA-B*5101  | 1e27     | LPPVVAKEI          | 9              | 2.20     | 0.18                |
| HLA-B*5101  | 1e28     | TAFTIPSI           | 8              | 3.00     | 0.26                |
| HLA-B*5301  | 1a1m     | TPYDINQML          | 9              | 2.30     | 0.28                |
| HLA-B*5301  | 1a1o     | KPIVQYDNF          | 9              | 2.30     | 0.84                |
| HLA-B*5703  | 2bvq     | KAFSPEVIP          | 9              | 2.00     | 0.50                |
| HLA-B*5703  | 2bvo     | <b>KAFSPEVIPMF</b> | 11             | 1.65     | 2.17                |
| HLA-B*5703  | 2bvp     | ISPRTLDAW          | 9              | 1.35     | 0.65                |
| HLA-Cw*0304 | 1efx     | GAVDPLLAL          | 9              | 3.00     | 0.35                |
| HLA-Cw*0401 | 1im9     | QYDDAVYKL          | 9              | 2.80     | 0.34                |
| HLA-E*0101  | 2esv     | VMAPRTLIL          | 9              | 2.60     | 0.66                |
| HLA-E*0103  | 1kpr     | VMAPRTVLL          | 9              | 2.80     | 1.02                |
| HLA-E*0103  | 1kti     | VTAPRTLLL          | 9              | 3.10     | 0.45                |
| HLA-E*0103  | 3cdg     | VMAPRTLFL          | 9              | 3.40     | 1.97                |
| HLA-G*0101  | 2dyp     | RIIPRHLQL          | 9              | 2.50     | 0.16                |
| H2-Db       | 1jpf     | <b>SGVENPGGYCL</b> | 11             | 2.18     | 0.36                |
| H2-Db       | 1jpg     | FQPQNGQFI          | 9              | 2.20     | 0.38                |
| H2-Db       | 1juf     | SSVIGVWYL          | 9              | 2.00     | 0.29                |
| H2-Db       | 1bz9     | FAPGVFPYM          | 9              | 2.80     | 1.19                |
| H2-Db       | 1ce6     | FAPGNYPAL          | 9              | 2.90     | 0.24                |
| H2-Db       | 1hoc     | ASNENMETM          | 9              | 2.40     | 0.46                |
| H2-Db       | 1ffo     | AAVYNFATM          | 9              | 2.65     | 0.25                |
| H2-Db       | 1ffp     | SAVYNFATM          | 9              | 2.60     | 0.33                |
| H2-Db       | 1fg2     | KAVYNFATC          | 9              | 2.75     | 0.19                |
| H2-Db       | 1inq     | SSVVGWVYL          | 9              | 2.20     | 0.42                |
| H2-Db       | 1n3n     | <b>SNLQNAASIA</b>  | 10             | 3.00     | 1.34                |
| H2-Db       | 1qlf     | FAPSNYPAL          | 9              | 2.65     | 0.26                |
| H2-Db       | 1s7v     | KAVYNLATM          | 9              | 2.20     | 0.27                |
| H2-Db       | 1s7w     | KALYNFATM          | 9              | 2.40     | 0.62                |
| H2-Db       | 1s7x     | KAVFNFATM          | 9              | 2.41     | 0.47                |
| H2-Db       | 1wbx     | <b>SQLKNAKEI</b>   | 10             | 1.90     | 0.38                |
| H2-Db       | 1wby     | <b>SLENFRAYV</b>   | 10             | 2.30     | 0.31                |
| H2-Db       | 1yn7     | <b>SLENFAAYV</b>   | 10             | 2.20     | 0.14                |
| H2-Db       | 2f74     | KAVYNFATM          | 9              | 2.70     | 0.27                |
| H2-Db       | 3buy     | LSLRNPILV          | 9              | 2.60     | 0.23                |
| H2-Dd       | 1qo3     | <b>RGPGRAFVTI</b>  | 10             | 2.30     | 0.17                |
| H2-Kb       | 1g6r     | SIYRYYGL           | 8              | 2.80     | 0.34                |
| H2-Kb       | 1s7q     | KAVYNFATM          | 9              | 1.99     | 0.09                |
| H2-Kb       | 1s7r     | KAVYNLATM          | 9              | 2.95     | 1.26                |
| H2-Kb       | 1s7s     | KALYNFATM          | 9              | 1.99     | 0.28                |
| H2-Kb       | 1s7t     | KAVFNFATM          | 9              | 2.30     | 0.19                |

| Allele        | PDB code | Peptide Sequence    | Peptide Length | Res. (Å) | C $\alpha$ RMSD (Å) |
|---------------|----------|---------------------|----------------|----------|---------------------|
| H2-Kb         | 1g7p     | SRDHSRTPM           | 9              | 1.50     | 0.17                |
| H2-Kb         | 1g7q     | SAPDTRPA            | 8              | 1.60     | 0.36                |
| H2-Kb         | 1kbg     | RGYVYXGL            | 8              | 2.20     | 0.47                |
| H2-Kb         | 1t0m     | SSIEFARL            | 8              | 2.00     | 0.21                |
| H2-Kb         | 1vac     | SIINFEKL            | 8              | 2.50     | 0.22                |
| H2-Kb         | 1wbz     | SSYRRPVGI           | 9              | 2.00     | 0.19                |
| H2-Kb         | 1rjz     | SEIEFARL            | 8              | 2.60     | 0.48                |
| H2-Kb         | 1kj2     | KVITFIDL            | 8              | 2.71     | 0.38                |
| H2-Kb         | 1lk2     | GNYSFYAL            | 8              | 1.35     | 0.53                |
| H2-Kb         | 1zhh     | KALYNYAPI           | 9              | 2.70     | 0.24                |
| H2-Kb         | 1mwa     | EQYKFYSV            | 8              | 2.40     | 0.27                |
| H2-Kb         | 2fo4     | SAPDFRPL            | 8              | 2.70     | 0.60                |
| H2-Kb         | 1n59     | AVYNFATM            | 8              | 2.95     | 0.44                |
| H2-Kb         | 2ol3     | SQYYNSL             | 8              | 2.90     | 0.30                |
| H2-Kb         | 1nam     | RGYVYQGL            | 8              | 2.70     | 0.38                |
| H2-Kb         | 1fo0     | INFDFTI             | 8              | 2.50     | 0.34                |
| H2-Kb         | 1osz     | RGYLYQGL            | 8              | 2.10     | 0.28                |
| H2-Kd         | 1vgk     | SYVNTNMGL           | 9              | 2.06     | 0.25                |
| H2-Kd         | 2fwo     | TYQRTRALV           | 9              | 2.60     | 0.26                |
| H2-Kk         | 1zt1     | FEANGNLI            | 8              | 2.50     | 0.45                |
| H2-Kk         | 1zt7     | SEFLLEKRI           | 9              | 3.00     | 0.45                |
| H2-Ld         | 1ldp     | APAAAAAAM           | 9              | 3.10     | 0.59                |
| H2-Ld         | 1ld9     | YPNVNIHNF           | 9              | 2.40     | 0.56                |
| H2-Ld         | 2e7l     | QLSPFPFDL           | 9              | 2.50     | 0.35                |
| H2-Ld         | 2oi9     | QLSPFPFDL           | 9              | 2.35     | 0.55                |
| H2-M3         | 1mhc     | MYFINILTL           | 9              | 2.10     | 1.16                |
| H2-Qa-2       | 1k8d     | ILMEHIHKL           | 9              | 2.30     | 0.55                |
| Mamu-A*01     | 1zvs     | TPPESANL            | 8              | 2.80     | 0.65                |
| RT1.Aa        | 1kjm     | AQFSASASR           | 9              | 2.35     | 0.49                |
| RT1-A1C       | 1kjb     | NPRAMQALL           | 9              | 1.48     | 0.33                |
| <b>MHC-II</b> |          |                     |                |          |                     |
| HLA-DQB1*0201 | 1s9v     | LQFPQPPELPY         | 11             | 2.22     | 0.33                |
| HLA-DQB1*0302 | 1jk8     | LVEALYLVCGERGG      | 14             | 2.40     | 0.31                |
| HLA-DQB1*0302 | 2nna     | SGEGSFQPSQENP       | 13             | 2.10     | 0.22                |
| HLA-DQB1*0602 | 1uvq     | MNLPSTKVSWAAVGGGSLV | 20             | 1.80     | 0.23                |
| HLA-DRA*0101  | 1zgl     | VHHFKNIVTPRTPG      | 14             | 2.80     | 1.27                |
| HLA-DRB1*0101 | 1aqd     | GSDWRFLRGYHQYA      | 14             | 2.45     | 0.28                |
| HLA-DRB1*0101 | 1fyt     | PKYVKQNTLKLAT       | 13             | 2.60     | 0.23                |
| HLA-DRB1*0101 | 1klu     | GELIGTLNAAKVPAD     | 15             | 1.93     | 0.20                |
| HLA-DRB1*0101 | 1pyw     | FVKQNAXAL           | 9              | 2.10     | 0.81                |
| HLA-DRB1*0101 | 1sje     | PEVIPMFSALSEGAT     | 15             | 2.45     | 0.46                |
| HLA-DRB1*0101 | 1sjh     | PEVIPMFSALSEG       | 13             | 2.25     | 0.22                |
| HLA-DRB1*0101 | 1t5w     | AAYSDDQATPLLLS      | 13             | 2.40     | 0.25                |
| HLA-DRB1*0101 | 2fse     | AGFKGEGQPKGEPG      | 14             | 3.10     | 0.64                |

| <b>Allele</b> | <b>PDB code</b> | <b>Peptide Sequence</b> | <b>Peptide Length</b> | <b>Res. (Å)</b> | <b>Cα RMSD (Å)</b> |
|---------------|-----------------|-------------------------|-----------------------|-----------------|--------------------|
| HLA-DRB1*0101 | 2iam            | GELIGILNAAKVPAD         | 15                    | 2.80            | 0.24               |
| HLA-DRB1*0301 | 1a6a            | PVSKMRMATPLLMQA         | 15                    | 2.75            | 0.30               |
| HLA-DRB1*0401 | 1d5m            | XXRAMXSX                | 8                     | 2.00            | 0.13               |
| HLA-DRB1*0401 | 1d5x            | XXRXXX                  | 6                     | 2.45            | 0.11               |
| HLA-DRB1*0401 | 1d5z            | XXRAXSX                 | 7                     | 2.00            | 0.22               |
| HLA-DRB1*0401 | 1d6e            | XXRXMASX                | 8                     | 2.45            | 0.14               |
| HLA-DRB1*0401 | 1j8h            | PKYVKQNTLKLAT           | 13                    | 2.40            | 0.20               |
| HLA-DRB1*0401 | 2seb            | AYMRADAAAGGA            | 12                    | 2.50            | 0.31               |
| HLA-DRB1*1501 | 1ymm            | ENPVVHFFKNIVTP          | 14                    | 3.50            | 0.28               |
| HLA-DRB3*0101 | 2q6w            | AWRSDEALPLG             | 11                    | 2.25            | 0.30               |
| HLA-DRB5*0101 | 1fv1            | NPVVHFFKNIVTPRTPPPSQ    | 20                    | 1.90            | 0.59               |
| HLA-DRB5*0101 | 1h15            | GGVYHFVKKHVHES          | 14                    | 3.10            | 0.22               |
| HLA-DRB5*0101 | 1hqr            | VHFFKNIVTP              | 10                    | 3.20            | 0.56               |
| I-Ab          | 1muj            | PVSKMRMATPLLMQA         | 15                    | 2.15            | 0.15               |
| I-Ad          | 1iao            | RGISQAVHAAHAEI          | 14                    | 2.60            | 0.27               |
| I-Ad          | 2iad            | GHATQGVTAASSHE          | 14                    | 2.40            | 0.56               |
| I-A(G7)       | 1es0            | YEIAPVFLLEYVT           | 14                    | 2.60            | 0.38               |
| I-Ak          | 1f3j            | AMKRHGLDNYRGYS          | 14                    | 3.10            | 0.28               |
| I-Ak          | 1iak            | STDYGILQINSRW           | 13                    | 1.90            | 0.23               |
| I-Ak          | 1jl4            | GNSHRGAIEWEGIESG        | 16                    | 4.30            | 0.35               |
| I-Au          | 1u3h            | SRGGASQYRPSQ            | 12                    | 2.42            | 0.95               |
| I-Au          | 2pxy            | RGGASQYRPSQ             | 11                    | 2.23            | 0.28               |
| I-Ek          | 1r5v            | ADLIAYPKAATKF           | 13                    | 2.50            | 0.28               |
| I-Ek          | 1r5w            | ADLIAYFKAATKF           | 13                    | 2.90            | 1.26               |
