# Supplementary material for: pDOCK: a new technique for rapid and accurate docking of peptide ligands to Major Histocompatibility Complexes
Source: PubMed Central journal article supplement (PMC2946780; doi:10.1186/1745-7580-6-s1-s2), 2010-09-27

## Additional File 2

### pDOCK: A new technique for rapid and accurate docking of peptide ligands to Major Histocompatibility Complexes

Javed M. Khan and Shoba Ranganathan

#### Figure S1 – Comparison of C $\alpha$ RMSD values obtained using pDOCK and our previous method across the benchmarking dataset.

The pMHC complex number refers to the serial number of the complexes listed in Table 1. The most significant pDOCK results are highlighted in yellow.

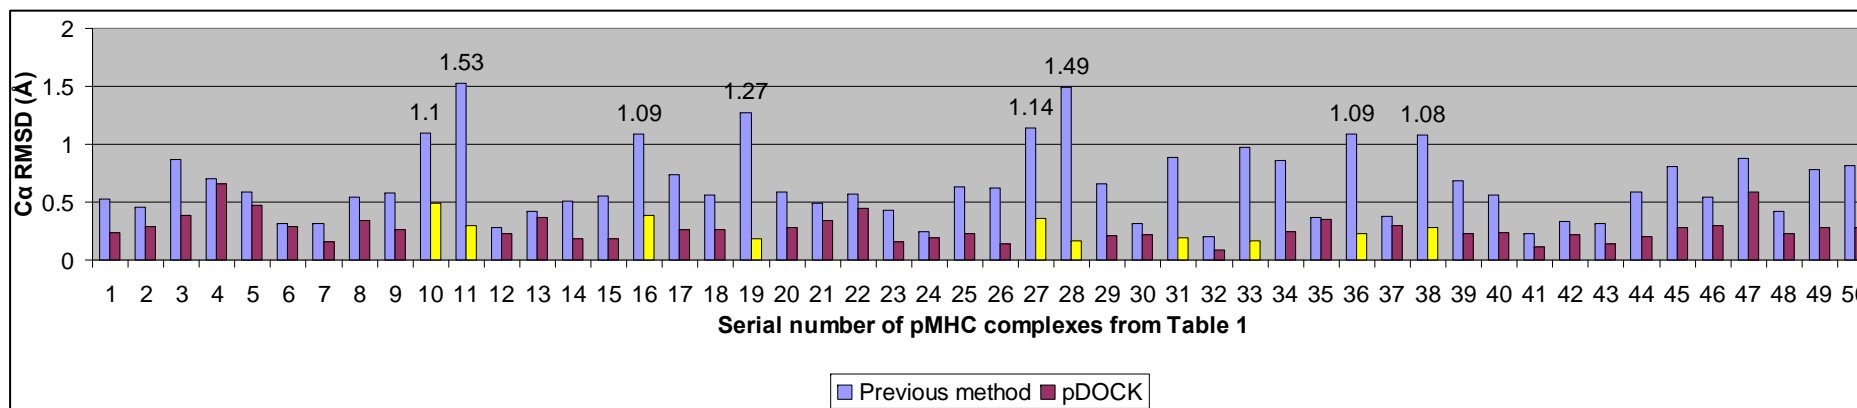

Supplement: 1745-7580-6-S1-S2-S2.pdf [file 1745-7580-6-S1-S2-S2.pdf]
